# Supplementary material for: Quantitative trait loci for whiteness of cooked rice detected in improved rice cultivars in Hokkaido
Source: PubMed Central journal article supplement — Breed Sci. 2015 Jun 1;65(3):201–7. doi: 10.1270/jsbbs.65.201 (PMC4482169; doi:10.1270/jsbbs.65.201), 2015-06-01
Supplement: 65_201_2.pdf [file 65_201_2.pdf]

Supplemental Table 1. List of rice cultivars used in this study

| <u>Cultivar</u> | <u>Cross combination</u>                                 | <u>Year of development</u> |
|-----------------|----------------------------------------------------------|----------------------------|
| Joiku No.462    | Hokkai No.302/ Joiku No.452                              | 2010                       |
| Jokei06214      | Jokei04501////Hoshinoyume                                | 2006                       |
| Hoshinoyume     | Akitakomachi / Dohoku No.48 // Jouiku No. 397(Kirara397) | 1996                       |
| Nanatsuboshi    | Hitomebore / Kukei90242A // Kuiku No.150                 | 2001                       |
| HokkaiPL9       | Kuiku No.139/Hokkai PL7//Kuiku No.147                    | 2003                       |
| Yukisayaka      | Satsukei9700(HokkaiPL9)/Kuiku No.160 (Akiho)             | 2011                       |
| Yumepirika      | Satsukei96118 / Joiku No.427                             | 2008                       |
| Kirara397       | Toiku No.214(Shimahikari) / Dohoku No.36(Kitaake)        | 1988                       |
| Daichinohoshi   | Kuiku No.151 / Joiku No.418(Hoshinoyume)                 | 2003                       |
